# Supplementary material for: The Spouses of Stroke Patients Have a Similar Oral Microbiome to Their Partners with an Elevated Risk of Stroke
Source: MDPI journal article supplement (doi:10.3390/microorganisms10112288), 2022-11-18
Supplement: s1 [file s1]

Table S1 The Framingham Stroke Profile

|                    | Points |                        |         |         |                        |         |         |                        |         |         |         |
|--------------------|--------|------------------------|---------|---------|------------------------|---------|---------|------------------------|---------|---------|---------|
|                    | 0      | +1                     | +2      | +3      | +4                     | +5      | +6      | +7                     | +8      | +9      | +10     |
| Men                |        |                        |         |         |                        |         |         |                        |         |         |         |
| Age,y              | 54-56  | 57-59                  | 60-62   | 63-65   | 66-68                  | 69-72   | 73-75   | 76-78                  | 79-81   | 82-84   | 85      |
| Untreated          | 97-105 | 106-115                | 116-125 | 126-135 | 136-145                | 146-155 | 156-165 | 166-175                | 176-185 | 186-195 | 196-205 |
| SBP, mm Hg         |        |                        |         |         |                        |         |         |                        |         |         |         |
| Treated SBP, mm Hg | 97-105 | 106-112                | 113-117 | 118-123 | 124-129                | 130-135 | 136-142 | 143-150                | 151-161 | 162-176 | 177-205 |
| Diabetes           | No     |                        | Yes     |         |                        |         |         |                        |         |         |         |
| Cigarette smoking  | No     |                        |         | Yes     |                        |         |         |                        |         |         |         |
| CYD                | No     |                        |         |         | Yes                    |         |         |                        |         |         |         |
| AF                 | No     |                        |         |         | Yes                    |         |         |                        |         |         |         |
| LVH                | No     |                        |         |         |                        | Yes     |         |                        |         |         |         |
|                    | Points | 10-Year Probability, % |         | Points  | 10-Year Probability, % |         | Points  | 10-Year Probability, % |         |         |         |
|                    | 1      | 3                      |         | 11      | 11                     |         | 21      | 42                     |         |         |         |
|                    | 2      | 3                      |         | 12      | 13                     |         | 22      | 47                     |         |         |         |
|                    | 3      | 4                      |         | 13      | 15                     |         | 23      | 52                     |         |         |         |
|                    | 4      | 4                      |         | 14      | 17                     |         | 24      | 57                     |         |         |         |
|                    | 5      | 5                      |         | 15      | 20                     |         | 25      | 63                     |         |         |         |
|                    | 6      | 5                      |         | 16      | 22                     |         | 26      | 68                     |         |         |         |
|                    | 7      | 6                      |         | 17      | 26                     |         | 27      | 74                     |         |         |         |
|                    | 8      | 7                      |         | 18      | 29                     |         | 28      | 79                     |         |         |         |
|                    | 9      | 8                      |         | 19      | 33                     |         | 29      | 84                     |         |         |         |
|                    | 10     | 10                     |         | 20      | 37                     |         | 30      | 88                     |         |         |         |
|                    | Points |                        |         |         |                        |         |         |                        |         |         |         |
|                    | 0      | +1                     | +2      | +3      | +4                     | +5      | +6      | +7                     | +8      | +9      | +10     |
| Women              |        |                        |         |         |                        |         |         |                        |         |         |         |
| Age,y              | 54-56  | 57-59                  | 60-62   | 63-64   | 65-67                  | 68-70   | 71-73   | 74-76                  | 77-78   | 79-81   | 82-84   |
| Untreated          |        | 95-106                 | 107-118 | 119-130 | 131-143                | 144-155 | 156-167 | 168-180                | 181-192 | 193-204 | 205-216 |
| SBP, mm Hg         |        |                        |         |         |                        |         |         |                        |         |         |         |
| Treated SBP, mm Hg |        | 95-106                 | 107-113 | 114-119 | 120-125                | 126-131 | 132-139 | 140-148                | 149-160 | 161-204 | 205-216 |
| Diabetes           | No     |                        |         | Yes     |                        |         |         |                        |         |         |         |
| Cigarette smoking  | No     |                        |         | Yes     |                        |         |         |                        |         |         |         |
| CYD                | No     |                        | Yes     |         |                        |         |         |                        |         |         |         |
| AF                 | No     |                        |         |         | Yes                    |         |         |                        |         |         |         |
| LVH                | No     |                        |         |         |                        |         | Yes     |                        |         |         |         |
|                    | Points | 10-Year Probability, % |         | Points  | 10-Year Probability, % |         | Points  | 10-Year Probability, % |         |         |         |
|                    | 1      | 1                      |         | 11      | 8                      |         | 21      | 43                     |         |         |         |
|                    | 2      | 1                      |         | 12      | 9                      |         | 22      | 50                     |         |         |         |
|                    | 3      | 2                      |         | 13      | 11                     |         | 23      | 57                     |         |         |         |

|    |   |    |    |    |    |
|----|---|----|----|----|----|
| 4  | 2 | 14 | 13 | 24 | 64 |
| 5  | 2 | 15 | 16 | 25 | 71 |
| 6  | 3 | 16 | 19 | 26 | 78 |
| 7  | 4 | 17 | 23 | 27 | 84 |
| 8  | 4 | 18 | 27 |    |    |
| 9  | 5 | 19 | 32 |    |    |
| 10 | 6 | 20 | 37 |    |    |

SBP indicates systolic blood pressure; CVD, cardiovascular disease, history of MI, angina pectoris, coronary insufficiency, intermittent claudication, or congestive heart failure; AF, atrial fibrillation; and LVH, left ventricular hypertrophy on ECG.

\*The table gives the probability of stroke within 10 years for men and women 55–85 years of age and free of previous stroke in the Framingham Heart Study. To use these tables, identify each of the patient's characteristics and obtain the corresponding point value from the top row of the table. Sum points for each individual and then obtain corresponding 10-year probability of stroke. For example, a 64-year-old man (3 points) has a treated SBP of 138 mm Hg (6 points), no diabetes (0 points), does not smoke (0 points), or have CVD (0 points) or AF (0 points) but has LVH (5 points). His total point score (11 points) corresponds to an 11% 10-year probability of stroke.
